# Supplementary figures and images for: Medicinal and Recreational Marijuana: Review of the Literature and Recommendations for the Plastic Surgeon
Source: PubMed Central journal article supplement — Plast Reconstr Surg Glob Open. 2020 May 29;8(5):e2838. doi: 10.1097/GOX.0000000000002838 (PMC7572176; doi:10.1097/gox.0000000000002838), 2020-05-29

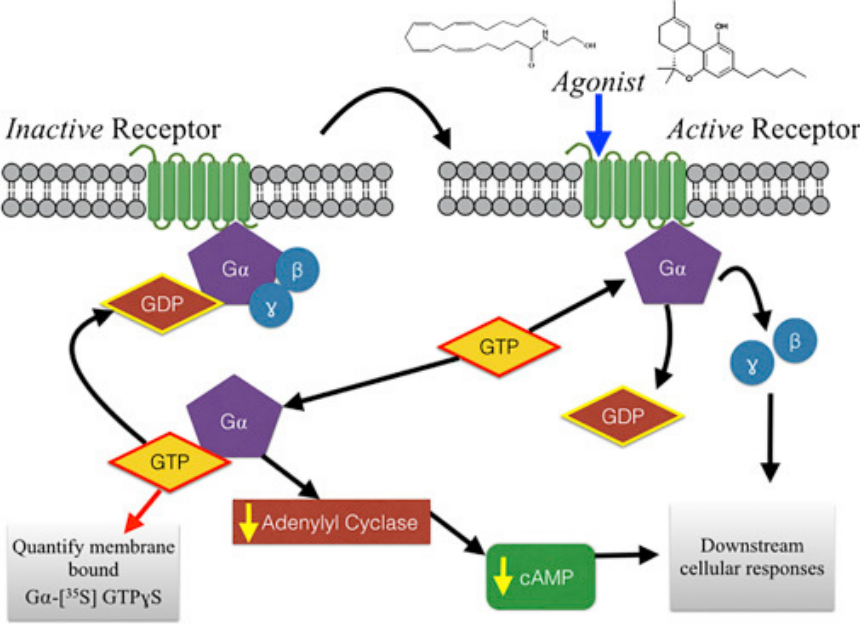

Supplement: gox-8-e2838-s002.pdf [file gox-8-e2838-s002.pdf]
